# Supplementary material for: Supplementation with >Your< Iron Syrup Corrects Iron Status in a Mouse Model of Diet-Induced Iron Deficiency
Source: MDPI journal article supplement (doi:10.3390/biology10050357), 2021-04-22
Supplement: s1 [file s1]

SUPPLEMENT

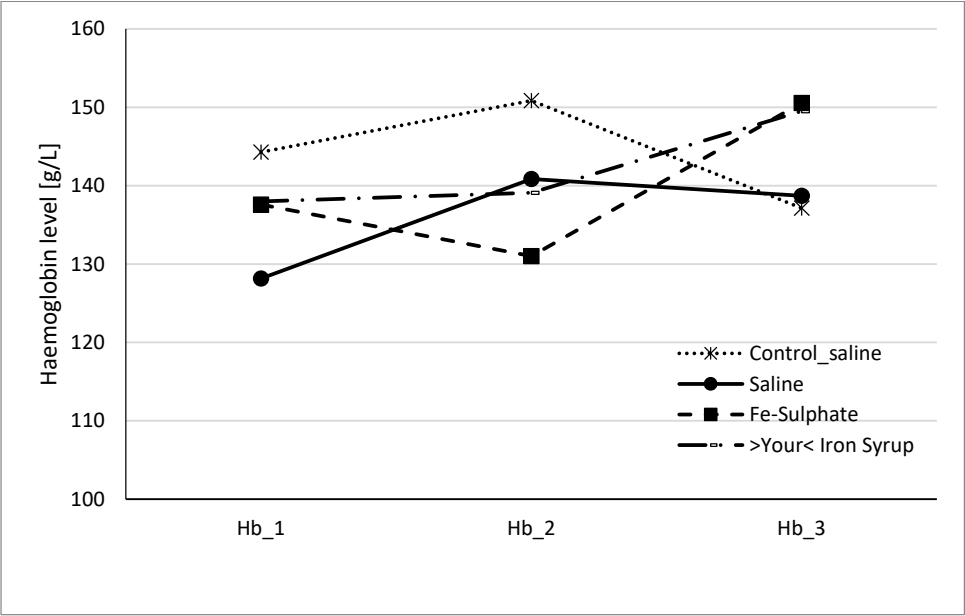

**Figure S1.** Haemoglobin concentration of female mice at the beginning of the gavage (Hb\_1), after one week (Hb\_2) of the gavage treatment and at the end of two-week gavage treatment (Hb\_3).

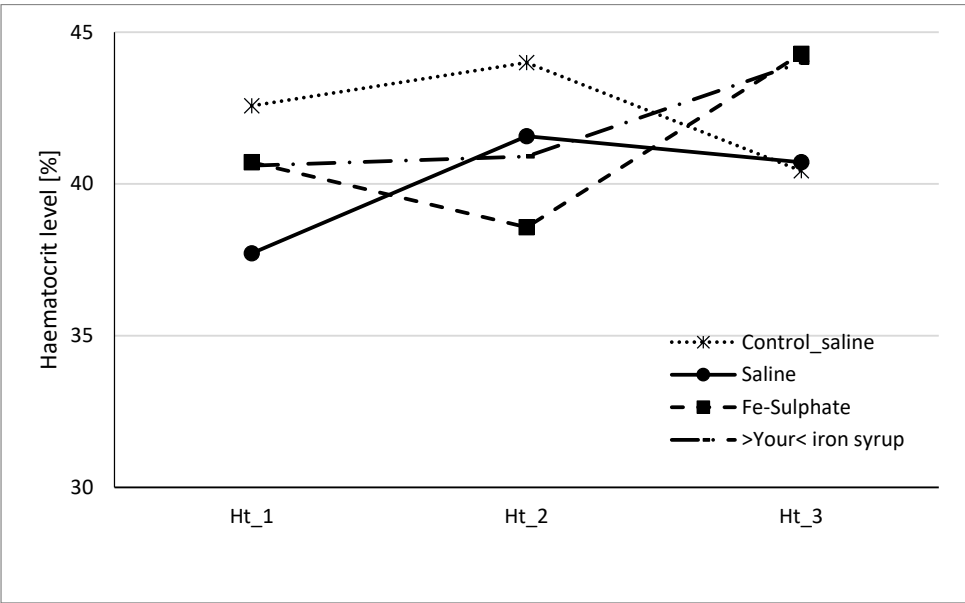

**Figure S2.** Haematocrit level of female mice at the beginning of the gavage (Ht\_1), after one week (Ht\_2) of the gavage treatment and at the end of two-week gavage treatment (Ht\_3).

**Table S1.** Body mass and consumed diet (females) (average  $\pm$  SEM). Differences between groups were not significant ( $p>0.05$ ).

|                            | Initial body mass<br>(g) | Final body mass<br>(g) | Consumed diet<br>(g/day) |
|----------------------------|--------------------------|------------------------|--------------------------|
| Control_saline             | 23.73 $\pm$ 0.52         | 21.73 $\pm$ 0.42       | 3.37 $\pm$ 0.17          |
| Iron deficient diet groups |                          |                        |                          |
| Saline                     | 22.87 $\pm$ 0.52         | 21.82 $\pm$ 0.42       | 3.11 $\pm$ 0.17          |
| Fe-sulphate                | 22.28 $\pm$ 0.52         | 21.41 $\pm$ 0.42       | 3.13 $\pm$ 0.17          |
| >Your< Iron Syrup          | 22.13 $\pm$ 0.43         | 21.38 $\pm$ 0.35       | 3.22 $\pm$ 0.15          |

**Table S2.** Body mass and consumed diet (males) (average  $\pm$  SEM). Differences between groups were not significant ( $p>0.05$ ).

|                            | Initial body mass<br>(g) | Final body mass<br>(g) | Consumed diet<br>(g/day) |
|----------------------------|--------------------------|------------------------|--------------------------|
| Control_saline             | 27.77 $\pm$ 0.64         | 27.95 $\pm$ 0.68       | 3.62 $\pm$ 0.16          |
| Iron deficient diet groups |                          |                        |                          |
| Saline                     | 26.39 $\pm$ 0.64         | 25.91 $\pm$ 0.68       | 3.52 $\pm$ 0.16          |
| Fe-sulphate                | 27.24 $\pm$ 0.60         | 27.02 $\pm$ 0.64       | 3.49 $\pm$ 0.16          |
| >Your< Iron Syrup          | 30.39 $\pm$ 0.53         | 28.85 $\pm$ 0.57       | 3.65 $\pm$ 0.14          |

**Table S3.** Liver and spleen mass in males and females (average  $\pm$  SEM). Differences between groups were not significant ( $p>0.05$ ).

|                            | Liver mass (g)  |                 | Spleen mass (mg) |                 |
|----------------------------|-----------------|-----------------|------------------|-----------------|
|                            | Male            | Female          | Male             | Female          |
| Control_saline             | 1.15 $\pm$ 0.05 | 0.90 $\pm$ 0.03 | 132.5 $\pm$ 1.2  | 127.7 $\pm$ 0.7 |
| Iron deficient diet groups |                 |                 |                  |                 |
| Saline                     | 1.10 $\pm$ 0.05 | 0.80 $\pm$ 0.03 | 118.7 $\pm$ 1.2  | 102.4 $\pm$ 0.7 |
| Fe-sulphate                | 1.08 $\pm$ 0.05 | 0.82 $\pm$ 0.03 | 104.3 $\pm$ 1.1  | 115.3 $\pm$ 0.7 |
| >Your< Iron Syrup          | 1.24 $\pm$ 0.04 | 0.83 $\pm$ 0.02 | 111.4 $\pm$ 1.0  | 103.0 $\pm$ 0.6 |

**Table S4.** Haemoglobin concentration (g/L) (average  $\pm$  SEM) before and after two weeks of gavage feeding. Differences between groups were not significant ( $p>0.05$ ).

|                            | Male            |                 | Female          |                 |
|----------------------------|-----------------|-----------------|-----------------|-----------------|
|                            | before          | after           | before          | after           |
| Control_saline             | 144.3 $\pm$ 6.7 | 137.4 $\pm$ 7.8 | 144.3 $\pm$ 4.5 | 137.1 $\pm$ 4.5 |
| Iron deficient diet groups |                 |                 |                 |                 |
| Saline                     | 115.4 $\pm$ 6.7 | 108.4 $\pm$ 7.8 | 128.1 $\pm$ 4.5 | 138.7 $\pm$ 4.5 |
| Fe-sulphate                | 127.6 $\pm$ 6.3 | 138.6 $\pm$ 7.3 | 137.6 $\pm$ 4.5 | 150.6 $\pm$ 4.5 |
| >Your< Iron Syrup          | 121.6 $\pm$ 5.6 | 139.3 $\pm$ 6.5 | 138.0 $\pm$ 3.8 | 149.5 $\pm$ 3.7 |

**Table S5.** Haematocrit level (%) (average  $\pm$  SEM) before and after two weeks of gavage feeding. Differences between groups were not significant ( $p>0.05$ ).

|                            | Male           |                | Female         |                |
|----------------------------|----------------|----------------|----------------|----------------|
|                            | before         | after          | before         | after          |
| Control_saline             | 42.0 $\pm$ 2.0 | 40.6 $\pm$ 2.3 | 42.6 $\pm$ 1.4 | 40.4 $\pm$ 1.3 |
| Iron deficient diet groups |                |                |                |                |
| Saline                     | 32.2 $\pm$ 2.0 | 31.8 $\pm$ 2.3 | 37.7 $\pm$ 1.4 | 40.7 $\pm$ 1.3 |
| Fe-sulphate                | 35.3 $\pm$ 1.8 | 39.3 $\pm$ 2.2 | 40.7 $\pm$ 1.4 | 44.3 $\pm$ 1.3 |
| >Your< Iron Syrup          | 35.6 $\pm$ 1.6 | 40.9 $\pm$ 1.9 | 40.6 $\pm$ 1.1 | 44.0 $\pm$ 1.1 |

**Table S6.** qPCR expression analyses of four inflammatory genes (*Crp*, *Saa1*, *Il6* and *Soc3*) in the liver (average  $\pm$  SEM).

|                            | <i>Crp</i> (dC <sub>T</sub> )  |                  | <i>Saa1</i> (dC <sub>T</sub> ) |                 |
|----------------------------|--------------------------------|------------------|--------------------------------|-----------------|
|                            | Male                           | Female           | Male                           | Female          |
| Control_saline             | 2.59 $\pm$ 0.43                | 1.26 $\pm$ 0.51  | -2.32 $\pm$ 1.07 <sup>b</sup>  | 4.13 $\pm$ 0.65 |
| Iron deficient diet groups |                                |                  |                                |                 |
| Saline                     | 2.86 $\pm$ 0.43                | 1.65 $\pm$ 0.67  | 3.04 $\pm$ 1.07 <sup>a</sup>   | 5.05 $\pm$ 0.65 |
| Fe-sulphate                | 2.76 $\pm$ 0.56                | 1.64 $\pm$ 0.48  | -1.36 $\pm$ 1.38 <sup>ab</sup> | 4.66 $\pm$ 0.75 |
| >Your< Iron Syrup          | 2.98 $\pm$ 0.43                | 1.62 $\pm$ 0.51  | 2.23 $\pm$ 1.07 <sup>ab</sup>  | 3.56 $\pm$ 0.46 |
|                            | <i>Il6</i> (dC <sub>T</sub> )  |                  | <i>Soc3</i> (dC <sub>T</sub> ) |                 |
|                            | Male                           | Female           | Male                           | Female          |
| Control_saline             | 10.06 $\pm$ 0.75 <sup>ab</sup> | 10.01 $\pm$ 0.94 | 6.85 $\pm$ 0.50                | 7.02 $\pm$ 0.42 |
| Iron deficient diet groups |                                |                  |                                |                 |
| Saline                     | 11.13 $\pm$ 0.75 <sup>ab</sup> | 11.89 $\pm$ 0.94 | 6.93 $\pm$ 0.50                | 7.74 $\pm$ 0.56 |
| Fe-sulphate                | 7.94 $\pm$ 0.96 <sup>b</sup>   | 11.41 $\pm$ 0.94 | 7.60 $\pm$ 0.65                | 7.05 $\pm$ 0.56 |
| >Your< Iron Syrup          | 12.68 $\pm$ 0.84 <sup>a</sup>  | 10.23 $\pm$ 0.67 | 6.33 $\pm$ 0.50                | 6.18 $\pm$ 0.40 |

<sup>ab</sup> Columns without the same superscript differ significantly between the groups inside the sex ( $p\leq 0.05$ ).

p- value for the sex effect: *Crp*:  $p=0.0030$ ; *Saa1*:  $p<0.0001$
